# Supplementary material for: A cysteine-based molecular code informs collagen C-propeptide assembly
Source: PubMed Central journal article supplement (PMC6181919; doi:10.1038/s41467-018-06185-2), 2018-10-11
Supplement: 41467_2018_6185_MOESM1_ESM.pdf [file 41467_2018_6185_MOESM1_ESM.pdf]

## **A Cysteine-Based Molecular Code Informs Collagen C-Propeptide Assembly**

DiChiara, A.S. and co-workers

| <b>Page</b> | <b>Contents</b>       |
|-------------|-----------------------|
| S1          | Table of Contents     |
| S2–S10      | Supplementary Figures |
| S11–12      | Supplementary Tables  |
| S13–16      | Supplementary Note    |

## SUPPLEMENTARY FIGURES

|                    |                                                            | C1 | C2      |      |
|--------------------|------------------------------------------------------------|----|---------|------|
| sponge_ColF1       | -----VNLGSVADVIELHKKLQHL--KSPTGT-KDSPARS                   | C  | HDLFLE  | 382  |
| Hydra_colα1(I)     | -----EKNKDTV1-EKLIRLEDITQGA--QKPDGS-EYFPAKS                | C  | KDLKMC  | 1262 |
| Hydra_col1         | -----TEIENNFNRRVKILKSSVEAY--KKPNGS-KEFPART                 | C  | RDIIYAF | 1213 |
| Hydra_col2         | -----EKNKDTV1-EKLIRLEDITQGA--QKPDGS-EYFPAKS                | C  | KDLKMC  | 1286 |
| Hydra_col3         | -----LVKLIKRR--TQENLRNFNKVWNTVLDLVLKNELG-T-RMHPAIT         | C  | RHFVFN  | 1690 |
| Hydra_col5         | -----VDEIIKR--NIDGFTMYRVFKT-ADKV-FLGGDGT-RDNPARS           | C  | LELFW   | 1194 |
| Red fire ant_α1(I) | -----ENLSSFKL--VKPDG-EKNSPAKT                              | C  | RDLFV   | 29   |
| Mollusk_α1(I)      | -----QYE--NLNRVREAIVRI--GGTRLGSRTPSGKN                     | C  | RDIKLS  | 734  |
| Sea urchin_Col1Pa  | -----KIQDTELLGAIISALGQQIELI--KAPQKAKTNPARS                 | C  | KDVFLN  | 3362 |
| Sea urchin_Col2Pa  | -----DRTOFQIYLAKFESEILSL--IEPLGS-RDQPIRS                   | C  | KDLFKC  | 3008 |
| lancelet_α1(I)     | -----IGKDTKVSDALEISAQIESL--KKPTGT-RKNPART                  | C  | VLDLAL  | 217  |
| lancelet_α2(I)     | STDIDHLKKLISRVPAAEWTDYFEGEMDRLQGI V K T I -VGGPWGT-AEYPART | C  | KDLMFA  | 2093 |
| Tunicate_α1(I)     | -----PEGLEEIIYAAMETLKQOLEMM--KEPMGRTOQDNPGRS               | C  | KDIWLC  | 1177 |
| Tunicate_α2(I)     | -----QPVTS--VGRDPEMLVLKELTSSVEDI--KAPRGVSRKTPARS           | C  | LDIYLA  | 1225 |
| Lamprey_α1(I)      | -----LPYGLVLDASIKALNAQVESI--TSPDGS-RKHPARS                 | C  | RDLMLC  | 1078 |
| Lamprey_α2(I)      | -----GERNLEASISSLNVRVENM--VSPDGS-QKNPART                   | C  | RNLKLC  | 992  |
| Shark_α1(I)        | -----RNRDLEVDSTLKSLSQIENI--RSPEGT-KKNPART                  | C  | RDLMKC  | 1256 |
| Shark_α2(I)        | -----SAKDFEVDATLKLQSSQIETL--LFPEGS-KKNPART                 | C  | RDRLLS  | 1168 |
| Coelacanth_α1(I)   | -----RDRHAEVETTLKSLTKQIDNI--RSPEGT-RKNPART                 | C  | RDLMKC  | 1262 |
| Coelacanth_α2(I)   | -----TEKDLEVDSTLKVLTNQIESI--RTPEGS-RKNPARS                 | C  | RDRLLS  | 1169 |
| Frog_α1(I)         | -----RDRDHEVDSTLKSLSQIENI--QSPEGT-RKNPART                  | C  | RDLMKC  | 1250 |
| Frog_α2(I)         | -----RPKDYEV DATLKSLSLNQIETI--LTPEGS-KKNPART               | C  | RDRLLS  | 1156 |
| Human_α1(I)        | -----RDRDLEVDSTLKSLSQIENI--RSPEGS-RKNPART                  | C  | RDLMKC  | 1265 |
| Human_α2(I)        | -----RPKDYEV DATLKSLSLNQIETL--LTPEGS-RKNPART               | C  | RDRLLS  | 1169 |
|                    |                                                            | C3 | C4      | C5   |
| sponge_ColF1       | --DNST--SD--GYYWIDPNGGIGDAVKVFCNFTGG--VQQTCISATKNAG--      |    |         | 426  |
| Hydra_colα1(I)     | --HPNV--IS--GEYYIDPSLGNVNDKIKVTC E F Y --PTASETCIKPTVSMF-- |    |         | 1306 |
| Hydra_col1         | --YPDS--SS--GMYIDPNKGGIDDAIYVHCNFTKSHDEETKITTCVYPEKTMSS--  |    |         | 1262 |
| Hydra_col2         | --HPNV--IS--GEYYIDPSLGNVNDKIKVTC E F Y --PTASETCIKPTVSMF-- |    |         | 1330 |
| Hydra_col3         | --NNNS--KS--GDYWIDPNEGSPVDAFLVYCNAS--TLETCTIPFKQPLV--      |    |         | 1732 |
| Hydra_col5         | --HLGA--NT--GDYWIDPNEGSPDSDVLVHCNKL--TNETCVYSKNTQI--       |    |         | 1236 |
| Red fire ant_α1(I) | A-YPD--KLSGEYWIDPNEGIRDAILVYC--DAE--KRA--TCILPNP--S--RSP   |    |         | 73   |
| Mollusk_α1(I)      | --NPDF--KD--GDYWIDPNGSALDAVKVFCRM--ETLETCTVCKPKIEY--       |    |         | 776  |
| Sea urchin_Col1Pa  | --NVEA--ES--GYYWVDPNLGQKDAIQVYCEA--ETGATCVPTNNVV--         |    |         | 3404 |
| Sea urchin_Col2Pa  | --YPEA--ED--GNYWIDPNEGSKDAFLAHCVKRGE--SGSPETCITPRVDEI--    |    |         | 3054 |
| lancelet_α1(I)     | --HPTW--PS--GNYWIDPNQGTVDIAIEVWCDM--KTLETCTVYKPAKV--       |    |         | 259  |
| lancelet_α2(I)     | --QPGL--KD--GYYFIDPDGGIENAFQAF CNFT--AGGLTCFQPTNDTL--      |    |         | 2136 |
| Tunicate_α1(I)     | --HPDF--PS--GNYWIDPNGGCSADAIIEVFCDFE--AEGDTCISPVERTASVSWL  |    |         | 1225 |
| Tunicate_α2(I)     | --EQQGTVPKSGVRWIDPNGGQADGLEVYCNF--HTMETCVVYPTNRNI--        |    |         | 1271 |
| Lamprey_α1(I)      | --HPEY--KSDTGEYWIDPNEGCRADAIKVWCNM--ETGESCVNPGMPSL--       |    |         | 1122 |
| Lamprey_α2(I)      | --YDDL--PS--GLYWIDPNEGSKSDAIQVWCNM--ETGESCMNADNPSI--       |    |         | 1034 |
| Shark_α1(I)        | --HPEW--KS--GDYWIDPNQGSALDAIRVYCNL--ETGETCVVSSPQSI--       |    |         | 1304 |
| Shark_α2(I)        | --HPEW--KS--GYYWIDPNQGTQDAIRVFCDF--TTGETCVHASPDI--         |    |         | 1211 |
| Coelacanth_α1(I)   | --HPEW--KS--GDYWIDPNQGMMLDAIKVYCNM--ETGETCVVYPTQSSV--      |    |         | 1298 |
| Coelacanth_α2(I)   | --HPEW--SS--GFYWIDPNQGTMDAIKVYCDF--TNGETCINANPETI--        |    |         | 1210 |
| Frog_α1(I)         | --HSDW--KS--GEYWIDPNQGIILDAIKVYCNM--ETGETCVVYPTQNSI--      |    |         | 1292 |
| Frog_α2(I)         | --HPDW--SS--GFYWIDPNQGTSDSIRVFCDF--STGETCIIHANPDSI--       |    |         | 1198 |
| Human_α1(I)        | --HSDW--KS--GEYWIDPNQGNLDAIKVYCNM--ETGETCVVYPTQPSV--       |    |         | 1307 |
| Human_α2(I)        | --HPEW--SS--GYYWIDPNQGTMDAIKVYCDF--STGETCIIAQPENI--        |    |         | 1211 |
|                    |                                                            |    |         |      |
| sponge_ColF1       | DLKS--WSGH-----SIWFSDM-LGGFKLTYDIS-----                    |    |         | 452  |
| Hydra_colα1(I)     | EKKK--WVSQST--DQWKWFNGEISSDSIFTYASQ-----                   |    |         | 1337 |
| Hydra_col1         | VEKD--SWPTKL-HTKAQRWFVEDH-ELGKLSYAAD-----                  |    |         | 1294 |
| Hydra_col2         | EKKK--WVSQST--DQWKWFNGEISSDSIFTYASQ-----                   |    |         | 1361 |
| Hydra_col3         | EKAD--WFTGK--DHLMWAYKDLAEGGITYSSD-----                     |    |         | 1762 |
| Hydra_col5         | SKNN--YFKDNT--DSYKWLMEVA--NNFDYAME-----                    |    |         | 1265 |
| Red fire ant_α1(I) | NITH-ITE----QOET--WLSE-IDNG--MK-----I-T                    |    |         | 96   |
| Mollusk_α1(I)      | RRDR--WTKDTT--SGQYFMYDVPFGKVKQFYDID-----                   |    |         | 807  |
| Sea urchin_Col1Pa  | SNMT--WYVGKT--KR--AFFSSMHGGDKFAYIED-----                   |    |         | 3433 |
| Sea urchin_Col2Pa  | SRAR--WYEGASG--SRYI--TEMGLEKFSYEAS-----                    |    |         | 3082 |
| lancelet_α1(I)     | PKAS--WYNGP--AKHVWFSESIKGGYQFGYTAD-----                    |    |         | 289  |
| lancelet_α2(I)     | ASPR--SPYK--VDNFTWFSEV-EGGFEIEYEGD-----                    |    |         | 2165 |
| Tunicate_α1(I)     | TSKR--WPKA-----QPGDWFSY-RMGDRFEYNTS-----                   |    |         | 1253 |
| Tunicate_α2(I)     | ENGT--HYTGE--PGHTYIYGEEMTRVEHADY-----                      |    |         | 1298 |
| Lamprey_α1(I)      | PRKN--WWRSA-ADKKHVWLGETMSPGSPQTYGDG-----                   |    |         | 1155 |
| Lamprey_α2(I)      | ARKN--WWLKPS-GSKKHVWFGVTMSPDAQTYGED-----                   |    |         | 1067 |
| Shark_α1(I)        | PQKN--WYTSKNPKKKHWFGEISMNGGFQFGYDAD-----                   |    |         | 1339 |
| Shark_α2(I)        | ERRN--WWISNDAQEKHWFGETIKDGAQTYNNEE-----                    |    |         | 1245 |
| Coelacanth_α1(I)   | PQKN--WYVSKNPKDKKHWFGETMNEGFPQFEYGE-----                   |    |         | 1332 |
| Coelacanth_α2(I)   | PSKT--WYISKNPMDKKHWFGETINGGTQFEYNDE-----                   |    |         | 1244 |
| Frog_α1(I)         | AQKN--WYTSKNPREKKHVWFGAAMSDFQFEYGE-----                    |    |         | 1326 |
| Frog_α2(I)         | PQKN--WYTSKT-QQRKHVWFGETINGGTQIEYNNEE-----                 |    |         | 1231 |
| Human_α1(I)        | AQKN--WYISKNPDKRHVWFGESMTDGFQFEYGGQ-----                   |    |         | 1341 |
| Human_α2(I)        | PAKN--WYRSS--KDKKHVWLGETINAGSQFEYNVE-----                  |    |         | 1243 |

**C6**

|                    |                                                 |      |
|--------------------|-------------------------------------------------|------|
| sponge_ColF1       | -----RSQLQFIRAASRHAVQSFTYKCRNSAAAVIFR           | 484  |
| Hydra_colα1(I)     | -----VQLRFLRLNSQFVRQNLTYHCLNSHAHNSDF            | 1368 |
| Hydra_col1         | -----QSQLTFLGLYSREAYQNVTFHCQNTLVVYDKQ           | 1326 |
| Hydra_col2         | -----VQLRFLRLNSQFVRQNLTYHCLNSHAHNSDF            | 1392 |
| Hydra_col3         | -----MVQLKMMQLLSAKCRQNTYFCKNSYSNITIK            | 1794 |
| Hydra_col5         | -----TPQMKILSLLSTTVRQTITFHCKNIPLLRGA-           | 1296 |
| Red fire ant_α1(I) | YK---A-D-----SNQISF---LQLLSKHANQNTYHCKNSVAYFDY- | 131  |
| Mollusk_α1(I)      | -----AYQLKVLQFDSQAARQGVYHCLNSHTYGRTRF           | 839  |
| Sea urchin_Col1Pa  | -----STQMTFLRLLSTARSQTVTYFCKNVQ-----            | 3459 |
| Sea urchin_Col2Pa  | -----EVQLTFLRLLSTKAHQNVTYHCKNSVAVRDRQ           | 3114 |
| lancelet_α1(I)     | -----DIQMQLRLLSSTSARQNVTYHCKNSVAYYDAV           | 321  |
| lancelet_α2(I)     | -----PIQLNYIQALSTRATQTFTECSSAVAWYNNW            | 2197 |
| Tunicate_α1(I)     | -----IPQFNFLRLLSSQAKQRFYTKCVNSIGWENQQ           | 1285 |
| Tunicate_α2(I)     | -----ASQLTFLRLLSSKAKQVTFRCRNMVAYYDAS            | 1330 |
| Lamprey_α1(I)      | -----SPNMEVQLTFLRLLSTDASQKITTYHCKNSVAYLDSR      | 1191 |
| Lamprey_α2(I)      | -----SHSTEIQTLFLRFLSTEASQKITTYHCKNSVAYQDGA      | 1103 |
| Shark_α1(I)        | -----GVLASDVAIQMTFLRLLSSEATQNVTYHCKNSIAYMDEE    | 1378 |
| Shark_α2(I)        | -----HITPLVMATQLTFLQLLSNEASONVTTYCKNSIAYMDEE    | 1284 |
| Coelacanth_α1(I)   | -----GSDPADVAIQTLFLRLLSSEASONITYHCKNSIAYMDQQ    | 1371 |
| Coelacanth_α2(I)   | -----SITPKIMATQLAFMRLLANQASONITYHCKNSIAYMDEQ    | 1283 |
| Frog_α1(I)         | -----GSDPADVAIQTLFLRLLMATEASONITYHCKNSVAYMDQA   | 1365 |
| Frog_α2(I)         | -----GVTSKDMATQFAPMRLLANHASONITYHCKNSIAYMDGQ    | 1270 |
| Human_α1(I)        | -----GSDPADVAIQTLFLRLLSSEASONITYHCKNSVAYMDQQ    | 1380 |
| Human_α2(I)        | -----GVTSKEMATQLAFMRLLANASONITYHCKNSIAYMDEE     | 1282 |

**C7**

|                    |                                                          |      |
|--------------------|----------------------------------------------------------|------|
| sponge_ColF1       | TQDN-----KEIA-----ANKVTYDGC-----KSRPS                    | 506  |
| Hydra_colα1(I)     | GNNRPYVKI-----MSSDDIEIH---TGSHMKNRL--KVLQDQC-----NKKDN   | 1407 |
| Hydra_col1         | NNDY----KKAMKFKGTEDQEFA---YSEDKQSMFMHAVNDEC-----SNMSK    | 1368 |
| Hydra_col2         | GNNRPYVKI-----MSSDDIEIH---TGSHMKNRL--KVLQDQC-----NKKDN   | 1431 |
| Hydra_col3         | TDENVHLHIHNGKISINPDETYIR---HGIALKLNL--MAIKDDC-----KVKDD  | 1839 |
| Hydra_col5         | K-NTIKFKLDNG-----AIY---HKKMRGVVL--KVTDDC-----TV-EN       | 1330 |
| Red fire ant_α1(I) | -----GNPFLSSSDVELV---DDQDSKFNYY--RTLEDGC-----SSSSS       | 3494 |
| Mollusk_α1(I)      | TGST----EQALRLMTSDVELS---LDAPSQEQY--EVIDEGC-----QERSA    | 3154 |
| Sea urchin_Col1Pa  | -E-RKTY--RRSLKLLAWNDAE-LSPR-GN-QRLRY-EMI-MDEC--LHQ-----N | 172  |
| Sea urchin_Col2Pa  | IT-----DSGDELDSA---EGRFKRSTYI--DILEGECEN-----VSSKDN      | 875  |
| lancelet_α1(I)     | SSNY----KKGLMLMGNGETELG---AQGPKKYQL--YAVEDGC-----QTPTG   | 361  |
| lancelet_α2(I)     | TDGY----DQAVRLLSNNENVLV---YGTGPV---KTIYDGC-----QFASP     | 2234 |
| Tunicate_α1(I)     | TGSF----DQAIHLLAANDEVLT---YGSEHL---TVIEDNC-----KT-GH     | 1321 |
| Tunicate_α2(I)     | ADNK----AQALKLRGFGDAEFT---AEGAVGTTY--RVLHDGC-----STRPT   | 1370 |
| Lamprey_α1(I)      | AGNL----KKALLMQGSSDVEIR---AEGNSRFTY--SVLEDGC-----THTG    | 1231 |
| Lamprey_α2(I)      | VGNL----QQALLQGSNEMEIR---AEGNSKLAY--SVLEDGC-----TMHTG    | 1143 |
| Shark_α1(I)        | AGNL----KKAVLLQGSNEIEIR---AEGNSRFTY--SVLEDGC-----TRHTG   | 1418 |
| Shark_α2(I)        | SGSL----KKAVLLQGSNDVELR---AEGNSRFTY--SVLEDGC-----TKHTG   | 1324 |
| Coelacanth_α1(I)   | AGNL----KKSLLQGSNEIEIR---AEGNSRFTY--SVLEDGC-----TRHTG    | 1411 |
| Coelacanth_α2(I)   | TGNL----KKAVMLQGSNDVELR---AEGNSRFTF--SVLEDGC-----TKHTS   | 1323 |
| Frog_α1(I)         | TGNL----KKALLQGSNEIEIR---AEGNSRFTY--SVLEDGC-----TQHTG    | 1405 |
| Frog_α2(I)         | TGNL----KKALLQGSNDVELR---AEGNSRFTF--SVLEDGC-----TQHTG    | 1310 |
| Human_α1(I)        | TGNL----KKALLQGSNEIEIR---AEGNSRFTY--SVTVDGC-----TSHTG    | 1420 |
| Human_α2(I)        | TGNL----KKAVILQGSNDVELV---AEGNSRFTY--TVLVDGC-----SKKTN   | 1322 |

**C8**

|                    |                                                |      |
|--------------------|------------------------------------------------|------|
| sponge_ColF1       | VPDAAFVAVETKRVEQLPIRDFASSDIAGQHQEFQFEMGPACFY-  | 550  |
| Hydra_colα1(I)     | QWHKTVFEFSSKITSRLPIVDVAVFDVANVGEQFGIELGPVCFY-  | 1451 |
| Hydra_col1         | EWRTTTLRFTSRKYIRLPIDFAPISSEDNNAMFVELGPVCFM-    | 1412 |
| Hydra_col2         | QWHKTVFEFSSKITSRLPIVDVAVFDVANVGEQFGIELGPVCFY-  | 1475 |
| Hydra_col3         | KWRESVFEITSNRLENLPIQDIGVTDIADGGEQFGLLIGPVCFS-  | 1883 |
| Hydra_col5         | KWQKLVLELSTSKNEILPVIDLGVHNGITSSIEIGVDIGPACFS-  | 1374 |
| Red fire ant_α1(I) | QWGSVVEYETKKTTRLPIDVFAPGEVGSQFMGLEMPVCFFS-     | 3538 |
| Mollusk_α1(I)      | EWSQTVINYSRRNTRLPIDVAPSDIGGEGQFEGITLGPVCFFS-   | 3198 |
| Sea urchin_Col1Pa  | HWGKTVVSJETDKPVRLPIDVALRDIGNPDQSFSEIGAACY--    | 215  |
| Sea urchin_Col2Pa  | QWHTNRVEVRTNKSELLPLVDVLLFDIGGENQQFVIDVGEVCFFS- | 919  |
| lancelet_α1(I)     | KWSSTVLEYKTKKTRLPFTDIAPYD-----                 | 387  |
| lancelet_α2(I)     | QLDLTVIEINTTATECPVVRDFGVFELDENGQEFQFVSVGVCFQ-  | 2278 |
| Tunicate_α1(I)     | GNGQVVLELRTREVDLLPLFDYKAFDFGTRSQRHGYQLDRVCFSG  | 1366 |
| Tunicate_α2(I)     | QWDRTEIEFETRLVGRMPTIDIAFPDIDGADQFQAKFGPVCFK-   | 1414 |
| Lamprey_α1(I)      | VWGTKVIEYRTQKTSRLPFMDIAPMDVGGSDQEFQFVGVGPVCF-  | 1275 |
| Lamprey_α2(I)      | QWGTKVIEYRTPKTSRLPIVDIAPKDVGGPDQEFQFVGVGPVCF-  | 1187 |
| Shark_α1(I)        | EWGRTVIEYKTKTSRLPIIDVAPMDVGGADQEFQFVIEGPVCF-   | 1462 |
| Shark_α2(I)        | EWSKTIIEYRTQKTSRLPFVMDIAPMDIGGPEQEFGLDIGPVCFK- | 1368 |
| Coelacanth_α1(I)   | AWGRTVIDYKTKTSRLPVIDIAPMDVGGADQEFQFVIEGPVCF-   | 1455 |
| Coelacanth_α2(I)   | QWGTKVIEYRTNKPTRLPILDIAPMDIGGADQEFGLDIGPVCFK-  | 1367 |
| Frog_α1(I)         | EWGKTVIDYKTKTSRLPITDVAPMDIGADQEFQFVIEGPVCFV-   | 1449 |
| Frog_α2(I)         | EWGRTVIEYRTNKPSRLPILDIAPLDIGDDQEFQFVIEGPVCFK-  | 1354 |
| Human_α1(I)        | AWGKTVIEYKTKTSRLPIIDVAPLDVGGADQEFQFVIEGPVCF-   | 1464 |
| Human_α2(I)        | EWGKTIVIEYKTKPSRLPFLDIAPLDIGGADQEFQFVIEGPVCFK- | 1366 |

**Supplementary Figure 1 | Full alignments of ancestral collagen-I C-Pro domains.**

Alignment of collagen-I C-Pro domains within the chordate lineage. Cys residues are highlighted in yellow. Amino acids previously proposed to be important for salt bridge formation are bolded in red. Amino acids other than cysteine in the conserved cysteine positions are bolded. The collagen recognition sequence is outlined by a black box in sequences where it is present. Amino acids involved in the Ca<sup>2+</sup> coordination network are marked with a “•” below the alignment. The accession numbers for each sequence are as follows: sponge\_ColF1 P18856, hydra\_α1(I) T2MHG7, hydra\_col1 AF525468, hydra\_col2 A1XVT1, hydra\_col3 A1XVT2, hydra\_col5 A1XVT3, sea urchin\_Col1Pa M92040, sea urchin\_ColP2a M92041, red fire ant\_α1(I) UniRef90\_UPI0005960200, mollusk\_α1(I) UniRef90\_UPI00084B9720, tunicate\_α1(I) H2YGA7, tunicate\_α2(I) H2YJN4, lancelet\_α1(I) AB193827.1, lancelet\_α2(I) XM\_019787639.1, lamprey\_α1(I) S4R787, lamprey\_α2(I) S4RDA0, shark\_α1(I) XM\_007910713.1, shark\_α2(I) XM\_007909256.1, coelacanth\_α1(I) XM\_005992184.2, coelacanth\_α2(I) XM\_006011624.2, frog\_α1(I) NM\_001011005.1, frog\_α2(I) NM\_001079250.1, human\_α1(I) NM\_000088.3, and human\_α2(I) NM\_000089.3.

## Reducing Coomassie SDS-PAGE

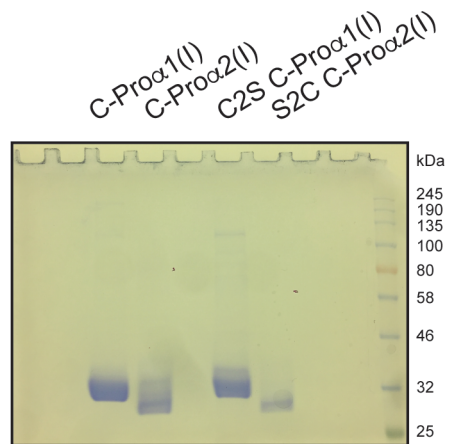**Supplementary Figure 2 | Collagen-I C-Pro purification.**

Coomassie staining of a reducing SDS-PAGE gel showing recombinantly prepared, purified samples of wild-type C-Pro $\alpha$ 1(I), wild-type C-Pro $\alpha$ 2(I), C2S C-Pro $\alpha$ 1(I), and S2C C-Pro $\alpha$ 2(I).

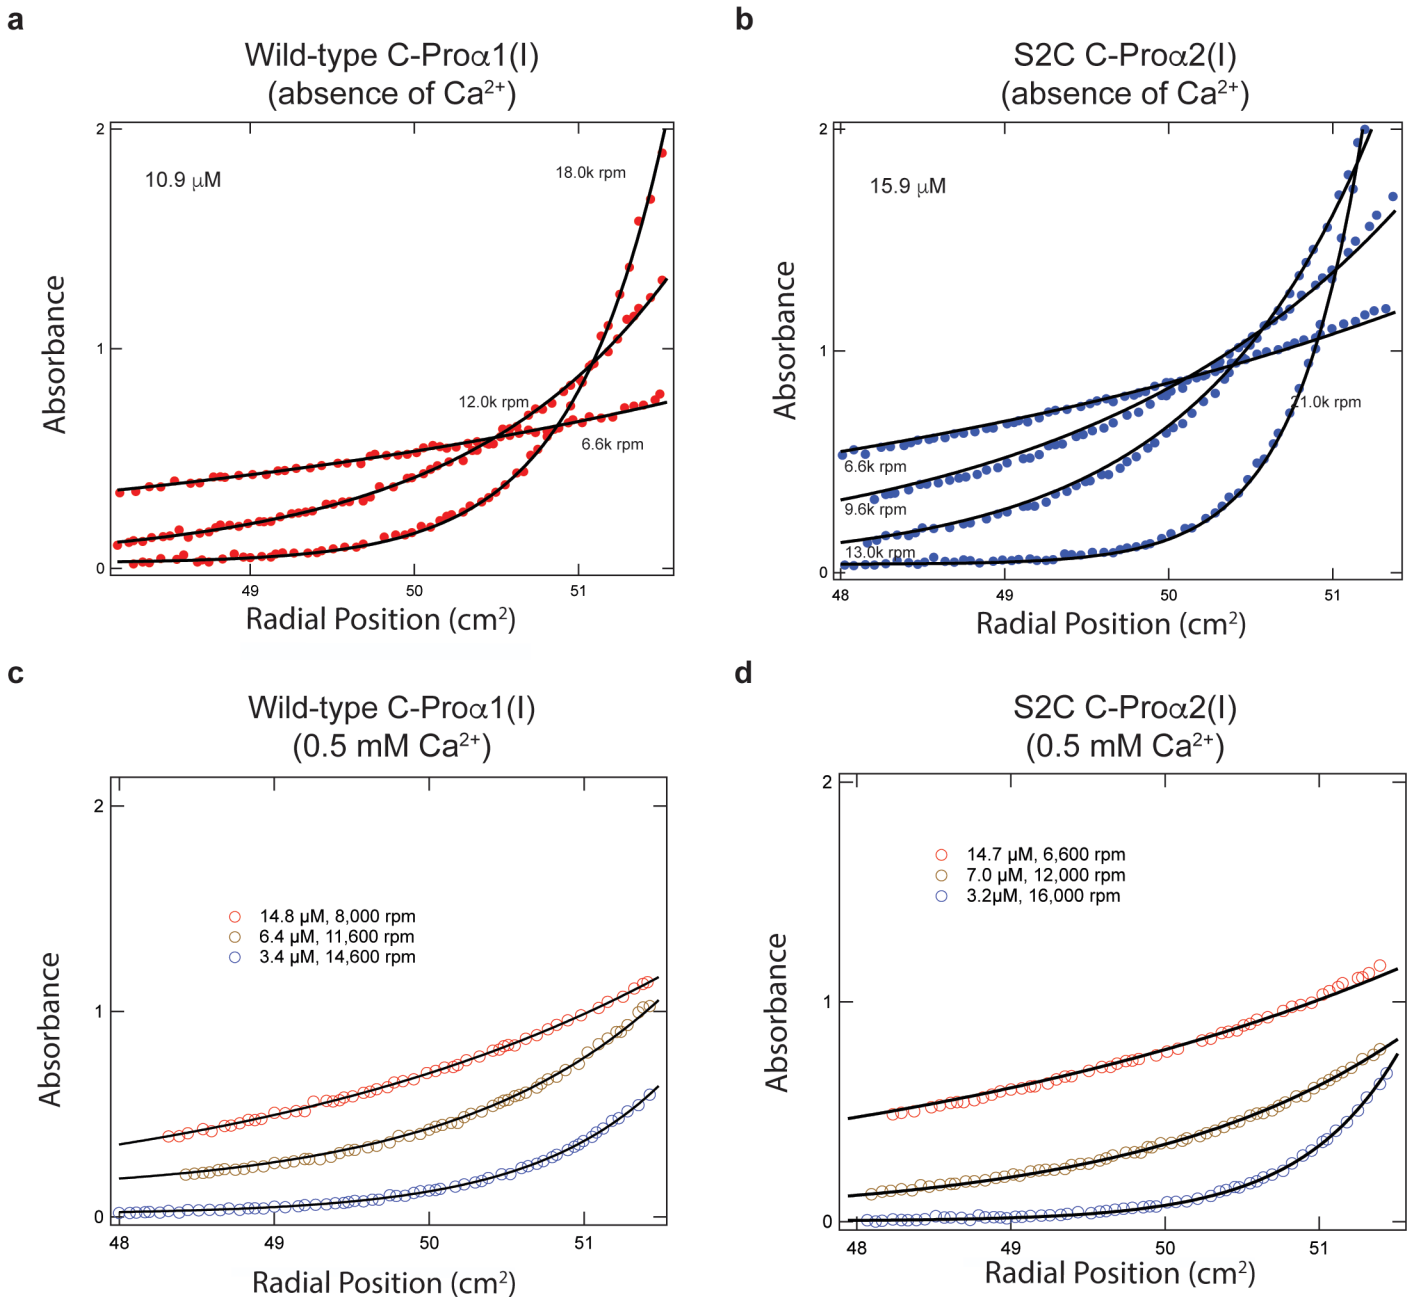

**Supplementary Figure 3 | Examples of global fits of the data collected for disulfide-linked homotrimeric C-Pro variants during sedimentation equilibrium analyses in the absence and presence of  $\text{Ca}^{2+}$ .**

- (a–b) Single species fits for wild-type C-Pro $\alpha$ 1(I) and S2C C-Pro $\alpha$ 2(I) at a single initial concentration and multiple speeds in the absence of  $\text{Ca}^{2+}$ . The fitted single species molecular weights based on a global fit to all the data available for each variant were 88,500 Da and 90,900 Da, respectively (showing only every second data point for clarity).
- (c–d) Examples of global single species fits of the data for wild-type C-Pro $\alpha$ 1(I) (c) and S2C C-Pro $\alpha$ 2(I) (d) at several concentrations and speeds (showing only every second data point for clarity) in the presence of  $\text{Ca}^{2+}$ .

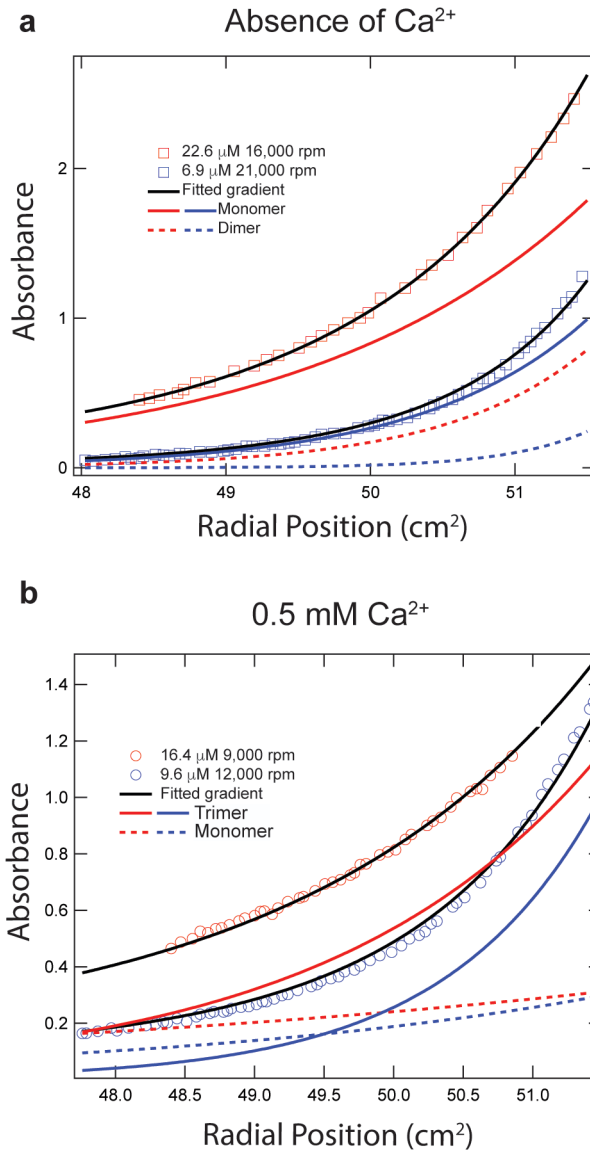

**Supplementary Figure 4 | Global fits for wild type C-Pro $\alpha$ 2(I) in the absence and presence of  $\text{Ca}^{2+}$ .**

- (a) Example global fit to a monomer–dimer equilibrium model for wild-type C-Pro $\alpha$ 2(I) in the absence of  $\text{Ca}^{2+}$ . The fitted gradient superimposes on the measured data (showing only every second data point for clarity). The contributions of the monomer and dimer species to the total gradient are also shown, based on a fitted equilibrium constant of  $6500 \text{ M}^{-1}$ . This distribution could be replaced by a single gradient with a molecular weight intermediate to the monomer and dimer, as shown in Fig. 4d.
- (b) Example global fit to a monomer–trimer equilibrium model for wild-type C-Pro $\alpha$ 2(I) in the presence of 0.5 mM  $\text{Ca}^{2+}$ . The fitted gradient superimposes on the measured data (showing only every second data point for clarity). The contributions of the monomer and trimer species to the total gradient are also shown.

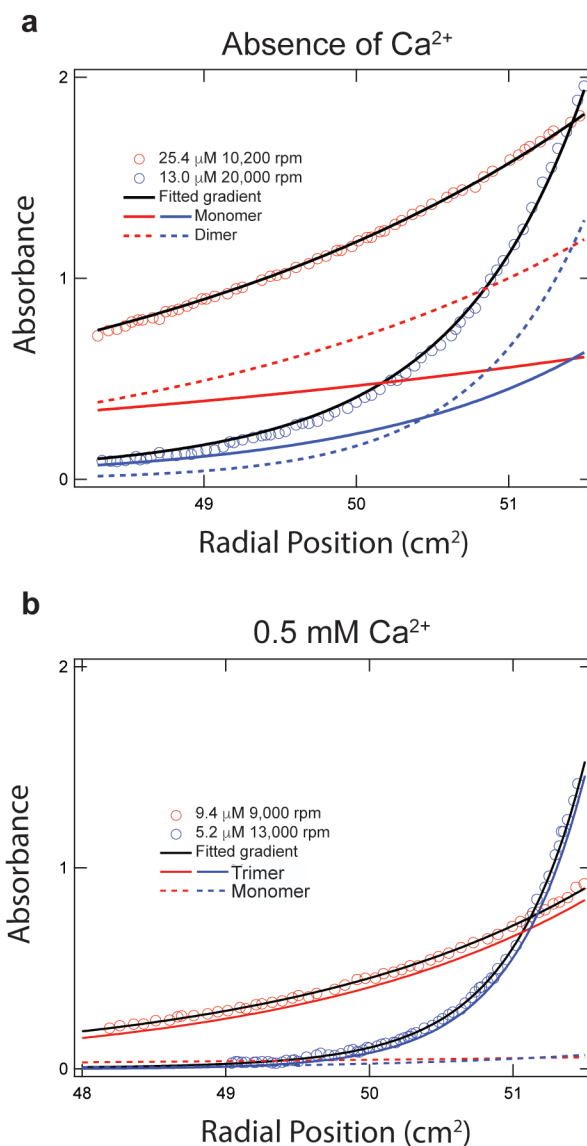

**Supplementary Figure 5 | Global fits for C2S C-Pro $\alpha$ 1(I) in the absence and presence of Ca $^{2+}$ .**

- (a) Example global fit to a monomer–dimer equilibrium model for C2S C-Pro $\alpha$ 1(I) in the absence of Ca $^{2+}$ . The fitted gradient superimposes on the measured data (showing only every second data point for clarity). The contributions of the monomer and dimer species to the total gradient are also shown, based on a fitted equilibrium constant of 76,300 M $^{-1}$ . This distribution could be replaced by a single gradient with a molecular weight intermediate to the monomer and dimer, as shown in Fig. 4e.
- (b) Example global fit to a monomer–trimer equilibrium model for C2S C-Pro $\alpha$ 1(I) in the presence of 0.5 mM Ca $^{2+}$ . The fitted gradient superimposes on the measured data (showing only every second data point for clarity). The contributions of the monomer and trimer species to the total gradient are also shown.



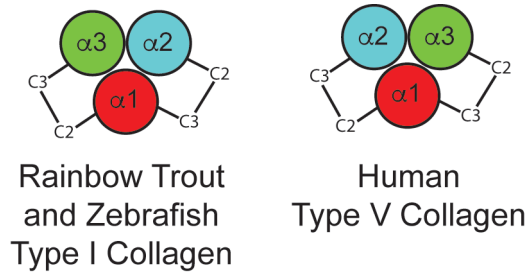**Supplementary Figure 6 | Topology of 1:1:1 heterotrimers.**

The cysteine-based code provides insight into the topology of the 1:1:1 heterotrimers that can form. Given the difference in cysteine patterns between Col $\alpha 2$ (I) and Col $\alpha 3$ (I) of rainbow trout and zebrafish versus Col $\alpha 2$ (V) and Col $\alpha 3$ (V) in humans, the  $\alpha 2$  and  $\alpha 3$  chains are likely in different orientations relative to the  $\alpha 1$  chain, which in all three species maintains cysteine residues in both the C2 and C3 positions.

**a Wild-type collagen-I C-Pro domains**

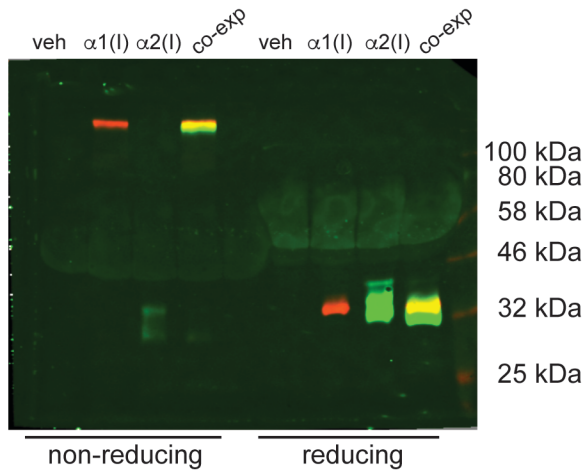

**b Cys/Ser variants of collagen-I C-Pro domains**

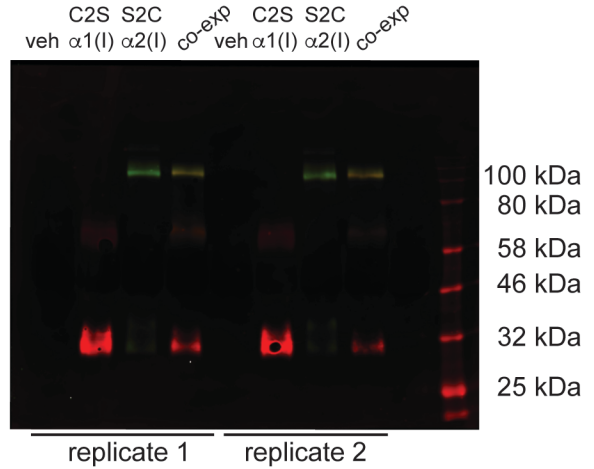

**c Cys/Ser variants of collagen-I C-Pro domains**

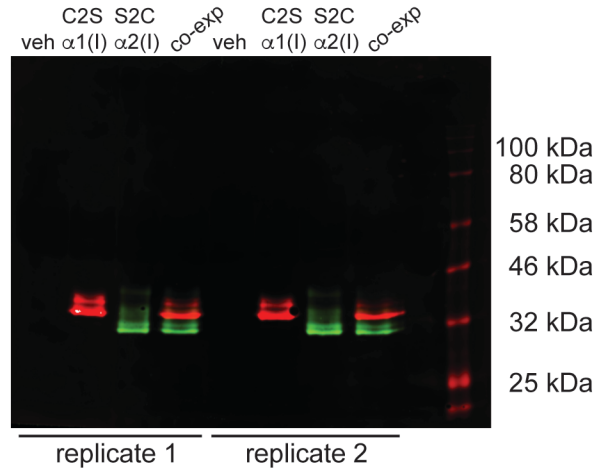

**d Wild-type and Ser variant of Col $\alpha$ 1(III)**

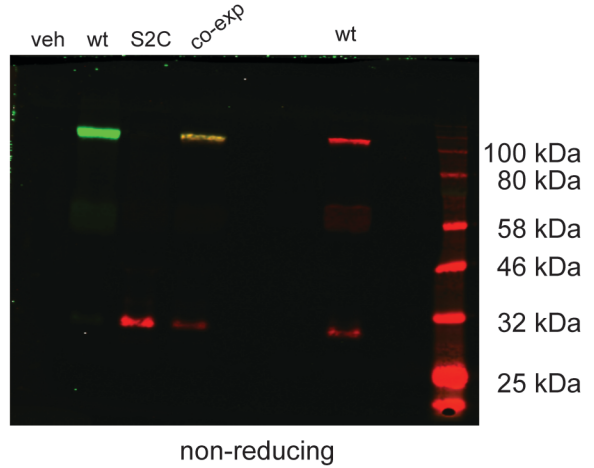

**Supplementary Figure 7 | Uncropped immunoblots for select results**

Select immunoblots are shown in the raw, uncropped form for transparency. The immunoblots shown correspond to Fig. 3a (a), Fig. 3b (b), Fig. 3c (c), and Fig. 7d (d).

## SUPPLEMENTARY TABLES

**Supplementary Table 1.** Disulfide bonding network of wild-type C-Pro $\alpha$ 1(I).

| Disulfide linkage | Digestion condition | Expected mass (charge) | Observed mass (charge) | Error (ppm) |
|-------------------|---------------------|------------------------|------------------------|-------------|
| C1 + C4           | GluC + LysC         | 957.4489 (+2)          | 957.4457 (+2)          | 3.33        |
|                   |                     | 638.6352 (+3)          | 638.6330 (+3)          | 3.44        |
|                   |                     | 479.2284 (+4)          | 479.2269 (+4)          | 3.04        |
|                   |                     | 383.5843 (+5)          | 383.5823 (+5)          | 5.08        |
| C2 + C3           | GluC + LysC         | 1327.5892 (+2)         | 1327.5896 (+2)         | 0.31        |
|                   |                     | 885.3954 (+3)          | 885.3944 (+3)          | 1.13        |
|                   |                     | 664.2985 (+4)          | 664.2977 (+4)          | 1.21        |
| C5 + C8           | GluC + LysC         | 531.6404 (+5)          | 531.6400 (+5)          | 0.70        |
|                   |                     | 1310.6386 (+2)         | 1310.6331 (+2)         | 4.23        |
|                   |                     | 874.0950 (+3)          | 874.0915 (+3)          | 4.04        |
| C6 + C7           | GluC + LysC         | 655.8232 (+4)          | 655.8195 (+4)          | 5.69        |
|                   |                     | 1198.8800 (+3)         | 1198.8787 (+3)         | 1.11        |
|                   |                     | 899.4120 (+4)          | 899.4109 (+4)          | 1.20        |
| C6 + C7           | GluC + LysC         | 719.7312 (+5)          | 719.7332 (+5)          | 2.85        |
|                   |                     | 599.9440 (+6)          | 599.9439 (+6)          | 0.05        |
|                   |                     | 514.3816 (+7)          | 514.3812 (+7)          | 0.83        |

**Supplementary Table 2.** Disulfide bonding network of S2C C-Pro $\alpha$ 2(I).

| Disulfide linkage | Digestion condition | Expected mass (charge) | Observed mass (charge) | Error (ppm) |
|-------------------|---------------------|------------------------|------------------------|-------------|
| C1 + C4           | GluC                | 724.0294 (+3)          | 724.0243 (+3)          | 7.00        |
|                   | GluC                | 543.2740 (+4)          | 543.2710 (+4)          | 5.49        |
|                   | GluC                | 434.8208 (+5)          | 434.8181 (+5)          | 6.09        |
| C2 + C3           | GluC                | 577.5895 (+3)          | 577.5933 (+3)          | 6.64        |
|                   | GluC                | 433.4441 (+4)          | 433.4469 (+4)          | 6.56        |
| C5 + C8           | GluC                | 839.9301 (+2)          | 839.928 (+2)           | 2.49        |
|                   | GluC                | 560.2893 (+3)          | 560.2884 (+3)          | 1.67        |
|                   | GluC                | 420.4690 (+4)          | 420.4677 (+4)          | 2.99        |
| C6 + C7           | trypsin             | 1024.1642 (+3)         | 1024.1644 (+3)         | 0.23        |
|                   | trypsin             | 768.3751 (+4)          | 768.3765 (+4)          | 1.85        |
|                   | trypsin             | 614.9016 (+5)          | 614.9039 (+5)          | 3.69        |

**Supplementary Table 3.** Primers used for site-directed mutagenesis of the indicated C-Pro domains.

| Primer Name             | Sequence                                              |
|-------------------------|-------------------------------------------------------|
| <i>COL1A1</i> C1265S F  | 5'- CCGTGACCTCAAGATGTCCCACTCTGACTGGAAG -3'            |
| <i>COL1A1</i> C1265S R  | 5'- CTTCCAGTCAGAGTGGGACATCTTGAGGTCACGG -3'            |
| <i>COL1A2</i> S1169C F  | 5'- CGTGACTTGAGACTCUGCCACCCAGAGTGGAG -3'              |
| <i>COL1A2</i> S1169C R  | 5'- CTCCACTCTGGGTGGCAGAGTCTCAAGTCACG -3'              |
| <i>COL2A1</i> C1306S F  | 5'-CCCCAACCAAGGCAGCACCTTGGACGC-3'                     |
| <i>COL2A1</i> C1306S R  | 5'-GCGTCCAAGGTGCTGCCTTGGTTGGGG-3'                     |
| <i>COL3A1</i> C1268S F  | 5'-TTGAGTTCAGGATGGCTGAATTCAGGTCTCTGC-3'               |
| <i>COL3A1</i> C1268S R  | 5'-GCAGAGACCTGAAATTCAGCCATCCTGAACTCAA-3'              |
| <i>COL5A1</i> C1645S F  | 5'-AGTCGGGGTGGCTGAGCTGCAGGTC-3'                       |
| <i>COL5A1</i> C1645S R  | 5'-GACCTGCAGCTCAGCCACCCCGACT-3'                       |
| <i>COL5A2</i> S1319C F  | 5'-TTGATTGCATCTTCAACACATCCTTGGTTAGGATCAATCC-3'        |
| <i>COL5A2</i> S1319C R  | 5'-GGATTGATCCTAACCAAGGATGTGTTGAAGATGCAATCAA-3'        |
| <i>COL5A3</i> N1550C F  | 5'-CGAGCTGCACCGCTGCCACCCGCACCTG-3'                    |
| <i>COL5A3</i> N1550C R  | 5'-CAGGTGCGGGTGGCAGCGGTGCAGCTCG-3'                    |
| <i>COL11A1</i> S1613C F | 5'-GGGAAGTCAGGATGGCAGAGTTGCAGGTCTTTA-3'               |
| <i>COL11A1</i> S1613C R | 5'-TAAAGACCTGCAACTCTGCCATCCTGACTTCCC-3'               |
| <i>COL11A2</i> C1577S F | 5'-AGCTCTGGGTGGCTCAGCTTCAGGTCC-3'                     |
| <i>COL11A2</i> C1577S R | 5'-GGACCTGAAGCTGAGCCACCCAGAGCT-3'                     |
| <i>COL24A1</i> C1551S F | 5'-TCCATCTGATACTTTTGTTCCTGTTAAGTAAATCTTTGCAGATTC-3'   |
| <i>COL24A1</i> C1551S R | 5'-GAATCTGCAAAGATTTACTTAACAGTGAACAAAAAGTATCAGATGGA-3' |
| <i>COL27A1</i> C1696S F | 5'-CCATCTTCTGCTCACTGTCCATGAGGTCCCT-3'                 |
| <i>COL27A1</i> C1696S R | 5'-AGGGACCTCATGGACAGTGAGCAGAAGATGG-3'                 |

**Supplementary Table 4.** Molecular properties (calculated and measured) of collagen-I C-Pro variants.

|                                    | wild-type<br>C-Pro $\alpha$ 1(I) | Cys1265Ser<br>C-Pro $\alpha$ 1(I) | wild-type<br>C-Pro $\alpha$ 2(I) | Ser1169Cys<br>C-Pro $\alpha$ 2(I) |
|------------------------------------|----------------------------------|-----------------------------------|----------------------------------|-----------------------------------|
| residues                           | 251                              | 251                               | 252                              | 252                               |
| $M_s$ (Da)                         | 27,909                           | 27,893                            | 28,225                           | 28,241                            |
| $\bar{v}$ (mL/g)                   | 0.723                            | 0.723                             | 0.728                            | 0.728                             |
| $\epsilon$ (M $^{-1}$ cm $^{-1}$ ) | 39,420                           | 39,420                            | 43,890                           | 43,890                            |
| MALDI-TOF (Da)                     | 29,183                           | 29,174                            | 29,371                           | 29,476                            |

## SUPPLEMENTARY NOTE 1

## Sequences of Open Reading Frames for C-Pro Domains

Color legend for all plasmids: Pre-protrypsin leader sequence Epitope tag HRV-3C protease cleavage site C-Pro domain

Wild-type PPT.His.C-Pro $\alpha$ 1(I):

ATGTCTGCACTTCTGATCCTAGCTCTTGTTGGAGCTGCAGTTGCTTACCCATACGATGTTCCAGATTACGC  
 TCACCATCACCATCACCATCTTGAAGTTCTTTTTCAAGGTCCTGATGATGCCAATGTGGTTCGTGACCGTG  
 ACCTCGAGGTGGACACCACCCTCAAGAGCCTGAGCCAGCAGATCGAGAACATCCGGAGCCCAGAGGGC  
 AGCCGCAAGAACCCCGCCCGCACCTGCCGTGACCTCAAGATGTGCCACTCTGACTGGAAGAGTGGAGAG  
 TACTGGATTGACCCCAACCAAGGCTGCAACCTGGATGCCATCAAAGTCTTCTGCAACATGGAGACTGGTG  
 AGACCTGCGTGTACCCCACTCAGCCAGTGTGGCCAGAAAGTGGTACATCAGCAAGAACCCCAAGG  
 ACAAGAGGCATGTCTGGTTCGGCGAGAGCATGACCGATGGATTCCAGTTCGAGTATGGCGGCCAGGGCT  
 CCGACCCTGCCGATGTGGCCATCCAGCTGACCTTCCTGCGCCTGATGTCCACCGAGGCCTCCAGAACA  
 TCACCTACCACTGCAAGAACAGCGTGGCCTACATGGACCAGCAGACTGGCAACCTCAAGAAGGCCCTGC  
 TCCTCCAGGGCTCCAACGAGATCGAGATCCGCGCCGAGGGCAACAGCCGCTTCACCTACAGCGTCACTG  
 TCGATGGCTGCACGAGTCACACCGAGCCTGGGGCAAGACAGTGATTGAATACAAAACCACCAAGACCT  
 CCCGCTGCCCATCATCGATGTGGCCCCCTTGACGTTGGTGCCCCAGACCAGGAATTCGGCTTCGACG  
 TTGGCCCTGTCTGCTTCCTGTAA

Wild-type PPT.His.C-Pro $\alpha$ 2(I):

ATGTCTGCACTTCTGATCCTAGCTCTTGTTGGAGCTGCAGTTGCTGACTACAAAGACGATGACGACAAGC  
 ACCATCACCATCACCATCTTGAAGTTCTTTTTCAAGGTCCTGCTGACCAGCCTCGCTCAGCACCTTCTCTC  
 AGACCAAGGACTATGAAGTTGATGCTACTCTGAAGTCTCTCAACAACCAGATTGAGACCCTTCTTACTCC  
 TGAAGGCTCTAGAAAGAACCCAGCTCGCACATGCCGTGACTTGAGACTCAGCCACCCAGAGTGGAGCAG  
 TGTTACTACTGGATTGACCCTAACCAAGGATGCACTATGGATGCTATCAAAGTATACTGTGATTTCTCTA  
 CTGGCGAAACCTGTATCCGGGCCCAACCTGAAAACATCCCAGCCAAGAACTGGTATAGGAGCTCCAAGG  
 ACAAGAAACACGTCTGGCTAGGAGAACTATCAATGCTGGCAGCCAGTTTGAATATAATGTAGAAGGAGT  
 GACTTCCAAGGAAATGGCTACCCAACCTTGCCTTCATGCGCCTGCTGGCCAACCTATGCCTCTCAGAACATC  
 ACCTACCACTGCAAGAACAGCATTGCATACATGGATGAGGAGACTGGCAACCTGAAAAGGCTGTCATTC  
 TACAGGGCTCTAATGATGTTGAACTTGTGCTGAGGGCAACAGCAGGTTCACTTACACTGTTCTTGTAGAT  
 GGCTGCTCTAAAAGACAAATGAATGGGGAAAGACAATCATTGAATACAAAACAAATAAGCCATCACGCCT  
 GCCCTTCCTTGATATTGCACCTTTGGACATCGGTGGTGCTGACCAGGAATTCTTTGTGGACATTGGCCCA  
 GTCTGTTTCAAATAA

PPT.HA C-Pro $\alpha$ 1(II):

ATGTCTGCACTTCTGATCCTAGCTCTTGTTGGAGCTGCAGTTGCTTACCCATACGATGTTCCAGATTACGC  
 TGCGGGCCGACAGACCAGGCAGCCGGTGGCCTGAGACAGCATGACGCCGAGGTGGATGCCCACTCAAGT  
 CCCTCAACAACCAGATTGAGAGCATCCGCAGCCCCGAGGGCTCCCGCAAGAACCCTGCTCGCACCTGCA  
 GAGACCTGAACTCTGCCACCCTGAGTGGAAAGAGTGGAGACTACTGGATTGACCCCAACCAAGGCTGCA  
 CTTGGACGCCATGAAGTTTTCTGCAACATGGAGACTGGCGAGACTTGCCTACCCCAATCCAGCAAA  
 CGTTCCCAAGAAGAACTGGTGGAGCAGCAAGAGCAAGGAGAAGAAACACATCTGGTTTTGGAGAAACCAT  
 CAATGGTGGCTTCCATTTTCACTATGGAGATGACAATCTGGCTCCCAACACTGCCAACGTCCAGATGACC  
 TTCCTACGCCTGCTGTCCACGGAAGGCTCCAGAACATCACCTACCACTGCAAGAACAGCATTGCCTATC  
 TGGACGAAGCAGCTGGCAACCTCAAGAAGGCCCTGCTCATCCAGGGCTCCAATGACGTGGAGATCCGGG  
 CAGAGGGCAATAGCAGGTTACGTACACTGCCCTGAAGGATGGCTGCACGAAACATACCGGTAAGTGGG

GCAAGACTGTTATCGAGTACCGGTCACAGAAGACCTCACGCCTCCCATCATTGACATTGCACCCATGGA  
CATAGGAGGGCCCGAGCAGGAATTCGGTGTGGACATAGGGCCGGTCTGCTTCTTGTA

**PPT.HA C-Pro $\alpha$ 1(III):**

ATGTCTGCACTTCTGATCCTAGCTCTTGTTGGAGCTGCAGTTGCTTACCCATACGATGTTCCAGATTACGC  
TGGCGCCGCAGATGAACCAATGGATTTCAAATCAACACCGATGAGATTATGACTTCACTCAAGTCTGTTA  
ATGGACAAATAGAAAGCCTCATTAGTCTGATGGTTCTCGTAAAACCCCGCTAGAAACTGCAGAGACCT  
GAAATTCTGCCATCCTGAACTCAAGAGTGGAGAATACTGGGTTGACCTAACCAAGGATGCAAATTGGAT  
GCTATCAAGGTATTCTGTAATATGGAACTGGGGAAACATGCATAAGTGCCAATCCTTTGAATGTTCCAG  
GAAACTGTTGGACAGATTCTAGTCTGAGAAGAAACACGTTTGGTTTGGAGAGTCCATGGATGGTGGT  
TTTCAGTTTAGCTACGGCAATCCTGAACTTCTGAAGATGTCCTTGATGTGCAGCTGGCATTCTTCGACT  
TCTCTCCAGCCGAGCTTCCCAGAACATCACATATCACTGCAAAAATAGCATTGCATACATGGATCAGGCCA  
GTGGAAATGTAAAGAAGGCCCTGAAGCTGATGGGGTCAAATGAAGGTGAATTCAAGGCTGAAGGAAATAG  
CAAATTCACCTACACAGTTCTGGAGGATGGTTGCACGAAACACACTGGGGAATGGAGCAAACAGTCTTT  
GAATATCGAACACGCAAGGCTGTGAGACTACCTATTGTAGATATTGCACCCTATGACATTGGTGGTCTGA  
TCAAGAATTTGGTGTGGACGTTGGCCCTGTTTGCTTTTTATAA

**PPT.HA C-Pro $\alpha$ 1(V):**

ATGTCTGCACTTCTGATCCTAGCTCTTGTTGGAGCTGCAGTTGCTTACCCATACGATGTTCCAGATTACGC  
TGGCGCCGCAGACGGCATGGAAGAGATCTTCGGCTCTCTCAACTCTCTGAAGCTGGAGATTGAGCAGAT  
GAAACGGCCCTGGGCACGCAGCAGAACCCCGCCCGCACCTGCAAGGACCTGCAGCTCTGCCACCCCG  
ACTTCCCAGATGGTGAATACTGGGTCGATCCTAACCAAGGATGCTCCAGGGATTCTTCAAGGTTTACTG  
CAACTTCACAGCCGGGGGTCGACATGCGTCTTCCCTGACAAGAAGTCCGAAGGGGCCAGAATCACTTC  
TTGGCCCAAAGAAAACCCGGGCTCCTGGTTCAAGCGTGGGAACTGCTCTCCTATGTGGAC  
GCCGAGGGCAACCCTGTGGGTGTGGTACAGATGACCTTCTGCGGCTGCTGAGCGCCTCTGCCACCA  
GAACGTCACCTACCACTGCTACCAAGTCAGTGGCCTGGCAGGACGCAGCCACGGGCAGCTACGACAAGG  
CCCTCCGCTTCTGGGCTCCAACGACGAGGAGATGTCTATGACAACAACCCCTACATCCGCGCCCTGG  
TGGACGGCTGTGCTACCAAGAAAGGCTACCAGAAGACGTTCTGGAGATCGACACCCCAAAGTGGAGC  
AGGTGCCCATCGTGGACATCATGTTCAATGACTTCGGTGAAGCGTCACAGAAATTTGGATTTGAAGTGGG  
GCCGGCTTGCTTCATGGGCTAG

**PPT.HA C-Pro $\alpha$ 2(V):**

ATGTCTGCACTTCTGATCCTAGCTCTTGTTGGAGCTGCAGTTGCTTACCCATACGATGTTCCAGATTACGC  
TGGCGCCGCAACAGCTGCTCTTGGGGATATCATGGGGCACTATGATGAAAGCATGCCAGATCCACTTCT  
GAGTTTACTGAAGATCAGGCGGCTCCTGATGACAAAACAAAACGGACCCAGGGGTTTCACTACCCTGA  
AGTCACTCAGTAGTCAGATTGAAACCATGCGCAGCCCGATGGCTCGAAAAGCACCCAGCCCGCACGT  
GTGATGACCTAAAGCTTTGCCATTCCGCAAAGCAGAGTGGTGAATACTGGATTGATCCTAACCAAGGATCT  
GTTGAAGATGCAATCAAAGTTTACTGCAACATGGAAACAGGAGAAACATGTATTTAGCAAACCCATCCAG  
TGTAACACGTAAAACCTGGTGGGCCAGTAAATCTCCTGACAATAAACCTGTTTGGTATGGTCTTGATATGA  
ACAGAGGGTCTCAGTTCGCTTATGGAGACCACCAATCACCTAATACAGCCATTACTCAGATGACTTTTTTG  
CGCCTTTTATCAAAGAAGCCTCCCAGAACATCACTTACATCTGTAAAACAGTGTAGGATACATGGACGA  
TCAAGCTAAGAACCTCAAAAAGCTGTGGTTCTCAAAGGGGCAAATGACTTAGATATCAAAGCAGAGGGA  
AATATTAGATTCGGTATATCGTTCTTCAAGACACTTGTCTAAGCGGAATGGAAATGTGGGCAAGACTGT  
CTTTGAATATAGAACACAGAATGTGGCACGCTTGCCCATCATAGATCTTGCTCCTGTGGATGTTGGCGGC  
ACAGACCAGGAATTCGGCGTTGAAATTGGGCCAGTTTGTGTTGTGTA

**PPT.HA C-Pro $\alpha$ 3(V):**

ATGTCTGCACTTCTGATCCTAGCTCTTGTTGGAGCTGCAGTTGCTTACCCATACGATGTTCCAGATTACGC  
 TGGCGCCGCAGAGGAGGTGCTGGCCTCGCTCACATCGCTGAGCTTGGAGCTGGAGCAGCTGCGGCGTC  
 CTCCCGGCACTGCGGAGCGCCCGGGCCTCGTGTGCCACGAGCTGCACCGCAACCACCCGCACCTGCCT  
 GATGGGGAATACTGGATTGACCCCAACCAGGGCTGCGCGCGGGACTCGTTCAGGGTTTTTTGCAACTTC  
 ACGGCGGGAGGAGAGACCTGCCTCTATCCCGACAAGAAGTTTGAGATCGTGAAATTGGCCTCCTGGTCC  
 AAGGAAAAGCCTGGAGGCTGGTATAGCACATTCCGTCGAGGGGAAGAAGTTCTCCTACGTGGACGCCGAC  
 GGGTCCCAGTGAATGTCGTGCAGCTGAACTTCTGAAACTGCTGAGTGCCACAGCTCGCCAGAATTCA  
 CCTACTCCTGCCAGAATGCAGCTGCCTGGCTGGACGAAGCCACGGGTGACTACAGCCACTCCGCCCGCT  
 TCCTTGGCACCAATGGAGAGGAGCTGTCTTTCAACCAGACGACAGCAGCCACTGTCAGCGTCCCCAGG  
 ATGGCTGCCGGCTCCGAAAGGACAGACGAAGACCCTTTTCGAATTCAGCTCTTCTCGAGCGGGATTTCT  
 GCCCCTGTGGGATGTGGCGGCCACTGACTTTGGCCAGACGAACCAAAAGTTTGGGTTTGAAGTGGGCC  
 CGTCTGCTTCAGCAGCTGA

**PPT.HA C-Pro $\alpha$ 1(XI):**

ATGTCTGCACTTCTGATCCTAGCTCTTGTTGGAGCTGCAGTTGCTTACCCATACGATGTTCCAGATTACGC  
 TGGCGCCGCAGATGCAGATGATAATATTCTTGATTACTCGGATGGAATGGAAGAAATATTTGGTTCCCTCA  
 ATCCCTGAAACAAGACATTGAGCATATGAAATTTCCAATGGTACTCAGACCAATCCAGCCCGAACTTGT  
 AAAGACCTGCAACTCAGCCATCCTGACTTCCCAGATGGTGAATATTGGATTGATCCTAACCAAGGTTGCTC  
 AGGAGATTCCTTCAAAGTTTACTGTAATTTACATCTGGTGGTGAGACTTGCATTTATCCAGACAAAAAATC  
 TGAGGGAGTAAGAATTTATCATGGCCAAAGGAGAAACCAGGAAGTTGGTTTAGTGAATTTAAGAGGGGA  
 AAAGTCTTTTACTACTTAGATGTTGAAGGAAATTCATCAATATGGTGCAATGACATTCCTGAAACTTCTG  
 ACTGCCTCTGCTCGGCAAAATTTACCTACCCTGTCATCAGTCAGCAGCCTGGTATGATGTGTCATCAG  
 GAAGTTATGACAAAGCACTTCGCTTCTGGGATCAAATGATGAGGAGATGTCCTATGACAATAATCCTTTT  
 ATCAAAACACTGTATGATGGTTGTGCGTCCAGAAAAGGCTATGAAAAGACTGTCATTGAAATCAATACACC  
 AAAAATTGATCAAGTACCTATTGTTGATGTCATGATCAATGACTTTGGTGATCAGAATCAGAAGTTCGGATT  
 TGAAGTTGGTCTGTTTGTCTTGGCTAA

**PPT.HA C-Pro $\alpha$ 2(XI):**

ATGTCTGCACTTCTGATCCTAGCTCTTGTTGGAGCTGCAGTTGCTTACCCATACGATGTTCCAGATTACGC  
 TGGCGCCGCAATCCAGCCACTGCCATTCAGATGCCAAGAAGACTCGGCGCTCGGTGGATGGAAGCCG  
 TCTGATGCAGGAAGATGAGGCCATACCGACCGGGGGAGCCCCGGCAGTCTGGGGGGCTGGAGGAGA  
 TCTTTGGCTCACTCGACTCCCTGCGGGAGGAGATCGAGCAGATGAGGCGGCCAACAGGGACCCAGGAC  
 AGCCCTGCTCGCACCTGCCAGGACCTGAAGCTGTGCCACCCAGAGCTTCCCGATGGAGAGTACTGGGTC  
 GACCCCAACCAGGGCTGTGCTCGGGATGCCTTCCGAGTTTTCTGCAACTTCACAGCAGGGGGTGAGACC  
 TGTGTGACGCCTAGGGATGACGTCACGCAGTTCTTACGTGGACTCAGAGGGCTCCCCAGTGGGTGTG  
 GTCCAGCTCACCTTCTGCGGCTGCTCAGCGTCTCAGCCCACCAGGACGTCTCCTACCCCTGCTCTGGA  
 GCAGCCCGTGACGGTCCCCTGAGACTCCGTGGGGCCAATGAGGATGAGCTGAGCCCGGAGACTAGCCC  
 CTATGTCAAAGAATTCAGAGATGGCTGCCAGACACAGCAAGGCCGGACGGTGTGGAGGTGCGAACGCC  
 TGTGCTGGAGCAGCTGCCAGTGTGATGCCTCCTTCTCAGACCTGGGAGCCCCACCGAGGCGGGGAG  
 GGGTGTGCTGGGGCCTGTCTGCTTCATGGGATAG

**PPT.HA C-Pro $\alpha$ 1(XXIV):**

ATGTCTGCACTTCTGATCCTAGCTCTTGTTGGAGCTGCAGTTGCTTACCCATACGATGTTCCAGATTACGC  
 TGGCGCCGCAGAAGAGATATCAAACCCTGAACTACCTTAGCAATTTATTGCACAGCATCAAGAATCCTC  
 TTGGCACACGAGATAACCCAGCACGAATCTGCAAAGATTTACTTAACTGTGAACAAAAAGTATCAGATGGA  
 AAATACTGGATTGACCCAAATCTTGGCTGTCTTCAGATGCCATTGAGGTTTTCTGCAATTTTCAGTGCTGG

TGGCCAGACATGCTTACCTCCTGTTTCTGTAACAAAGTTGGAGTTTGGAGTTGGGAAAGTCCAGATGAACT  
 TCCTTCATTTACTGAGTTCGGAAGCCACCCATATCATCACCATTCACTGTCTAAACACCCCAAGGTGGACA  
 AGCACACAAACAAGTGGCCAGGATTGCCTATTGTTTTCAAGGGATGGAATGGCCAGATTTTTAAAGTAAA  
 CACTCTACTTTGAACCTAAAGTGCTTTTCAAGATGACTGCAAGATTCAAGATGGCAGCTGGCATAAGGCAACAT  
 TTCTTTTTTACACCCAGGAACCTAATCAACTTCCAGTGATTGAAGTACAAAACTTCTCATCTCAAACTG  
 AACGAAAGTATTACATTGACAGCAGTTCTGTATGCTTTTCTGTAA

**PPT.HA C-Pro $\alpha$ 1(XXVII):**

ATGTCTGCACTTCTGATCCTAGCTCTTGTGGAGCTGCAGTTGCTTACCCATACGATGTTCCAGATTACGC  
 TGGCGCCGCAATCCAATTGCAACAAGATGATCTTGGGGCAGCTTTCCAGACGTGGATGGACACCAGTGG  
 AGCACTCAGGCCAGAGAGTTACAGCTATCCAGACCGGCTGGTGCTGGACCAGGGAGGAGAGATCTTTAA  
 AACCTTACACTACCTCAGCAACCTCATCCAGAGCATTAAAGACGCCCTGGGCACCAAAGAGAACCCCGCC  
 CGGGTCTGCAGGGACCTCATGGACTGTGAGCAGAAGATGGTGGATGGTACCTACTGGGTGGATCCAAAC  
 CTTGGCTGCTCCTCTGACACCATCGAGGTCTCCTGCAACTTCACTCATGGTGGACAGACGTGTCTCAAGC  
 CCATCACGGCCTCCAAGGTCGAGTTTGCCATCAGCCGGGTCCAGATGAATTTCTGCACCTGCTAAGCTC  
 CGAGGTGACCCAGCACATCACCATCCACTGCCTTAACATGACCGTGTGGCAGGAGGGCACTGGGCAGAC  
 CCCAGCCAAGCAGGCCGTACGCTTCCGGGCCTGGAATGGACAGATTTTTGAAGCTGGGGGTGAGTTCCG  
 GCCCGAGGTGTCCATGGATGGCTGCAAGGTCCAAGATGGCCGCTGGCATCAGACACTCTTACCTTCCG  
 GACCCAAGACCCCAACAGCTGCCATCATCAGTGTGGACAACCTCCCTCCTGCCTCATCAGGGAAGCA  
 GTACCGCCTGGAAGTTGGACCTGCGTGCTTCCTCTGA
